# Supplementary material
Source: Springer Nature journal article supplement (https://www.springermedizin.de/resource/supplementary/13618_2011_20_MOESM7_ESM.pdf/9680974)

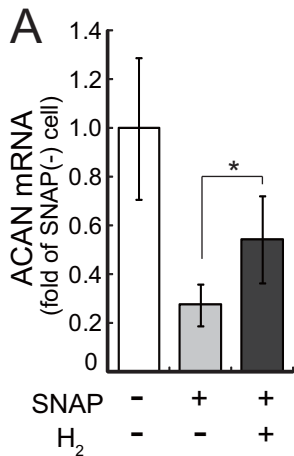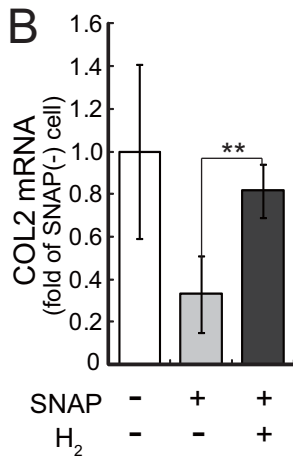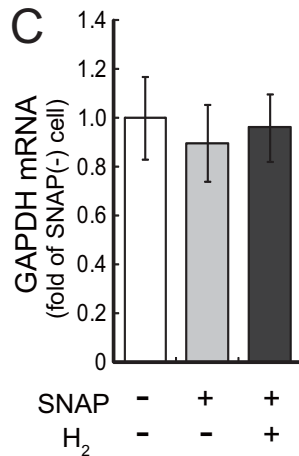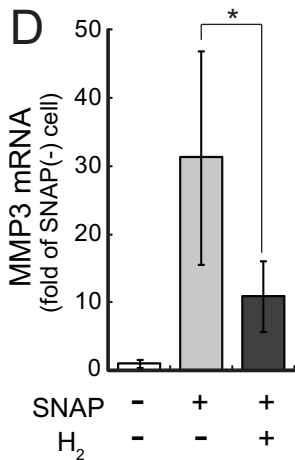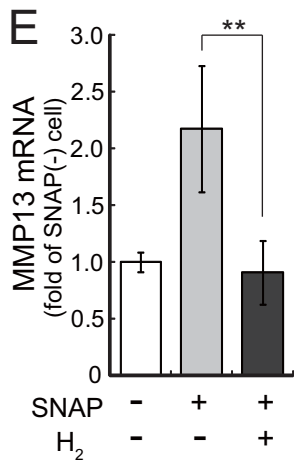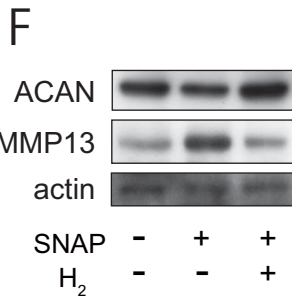

Supplement: MOESM7 [file 9680974]
